# Supplementary material for: Synthesis of a new water-soluble hexacarboxylated tribenzotriquinacene derivative and its competitive host–guest interaction for drug delivery
Source: publisher site journal article supplement (doi:10.3762/bjoc.18.56), 2022-05-12
Supplement: Additional file 1 [file 1860-5397-18-56-S1.pdf]

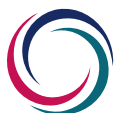

## Supporting Information

for

### **Synthesis of a new water-soluble hexacarboxylated tribenzotriquinacene derivative and its competitive host–guest interaction for drug delivery**

Man-Ping Li, Nan Yang and Wen-Rong Xu

*Beilstein J. Org. Chem.* **2022**, *18*, 539–548. [doi:10.3762/bjoc.18.56](https://doi.org/10.3762/bjoc.18.56)

**Copies of NMR and mass spectra and fluorescence spectra of TBTQ–CB6 with MV and DOX, respectively, at different ratios**

## Table of contents

|                    |                                                                                                                                                             |    |
|--------------------|-------------------------------------------------------------------------------------------------------------------------------------------------------------|----|
| <b>Figure S1:</b>  | $^1\text{H}$ NMR spectrum of compound <b>2</b> .....                                                                                                        | S1 |
| <b>Figure S2:</b>  | $^{13}\text{C}$ NMR spectrum of compound <b>2</b> .....                                                                                                     | S1 |
| <b>Figure S3:</b>  | (+)-ESI mass spectrum of compound <b>2</b> .....                                                                                                            | S2 |
| <b>Figure S4:</b>  | $^1\text{H}$ NMR spectrum of compound <b>3</b> .....                                                                                                        | S2 |
| <b>Figure S5:</b>  | $^{13}\text{C}$ NMR spectrum of compound <b>3</b> .....                                                                                                     | S3 |
| <b>Figure S6:</b>  | MALDI-TOF mass spectrum of compound <b>3</b> .....                                                                                                          | S3 |
| <b>Figure S7:</b>  | $^1\text{H}$ NMR spectrum of compound <b>TBTQ-CB6</b> .....                                                                                                 | S4 |
| <b>Figure S8:</b>  | $^{13}\text{C}$ NMR spectrum of compound <b>TBTQ-CB6</b> .....                                                                                              | S4 |
| <b>Figure S9:</b>  | MALDI-TOF mass spectrum of compound <b>TBTQ-CB6</b> .....                                                                                                   | S5 |
| <b>Figure S10:</b> | Fluorescence spectra of the mixture of <b>TBTQ-CB6</b> and <b>MV</b> in different molar ratios at a constant total concentration of 10 $\mu\text{M}$ .....  | S5 |
| <b>Figure S11:</b> | Fluorescence spectra of the mixture of <b>TBTQ-CB6</b> and <b>DOX</b> in different molar ratios at a constant total concentration of 10 $\mu\text{M}$ ..... | S6 |

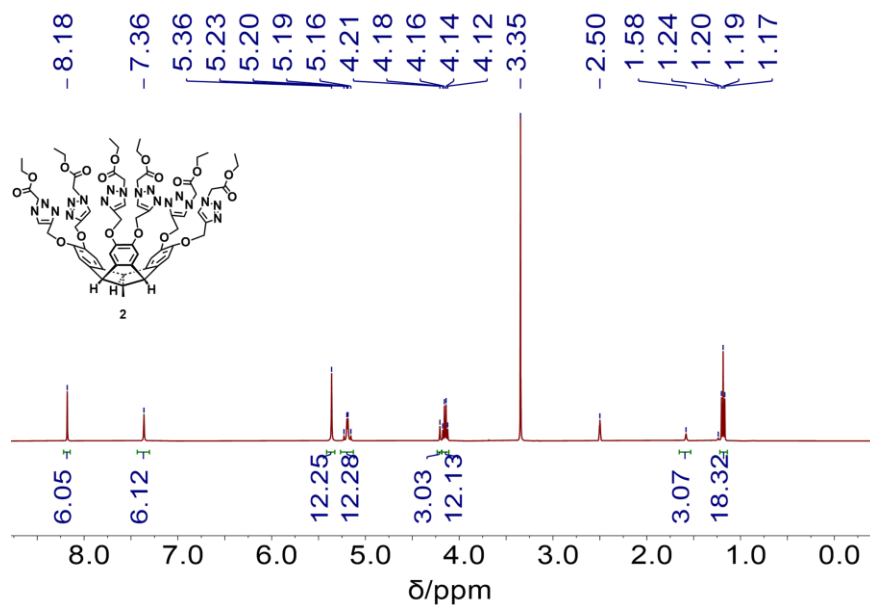

**Figure S1:** <sup>1</sup>H NMR spectrum of compound **2** (400 MHz, DMSO-*d*<sub>6</sub>, 25 °C).

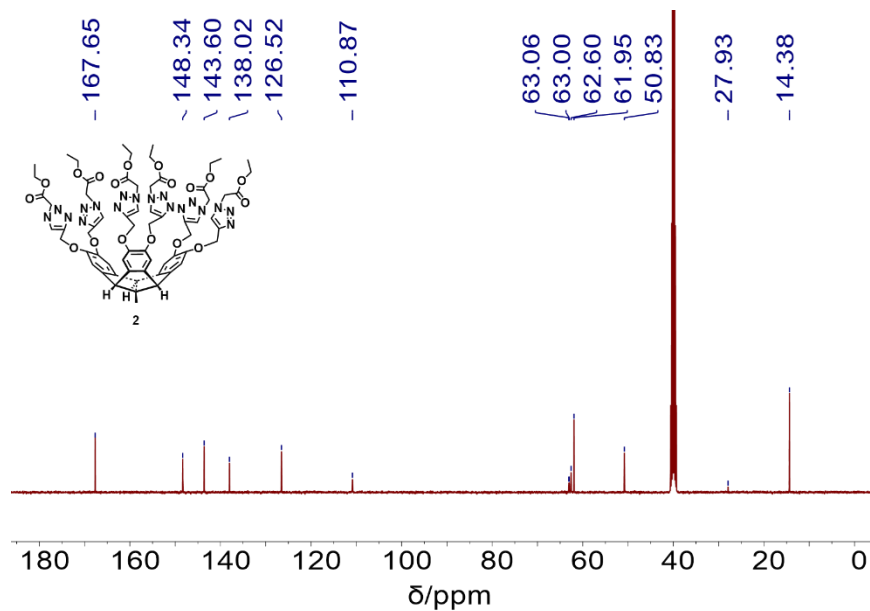

**Figure S2:** <sup>13</sup>C NMR spectrum of compound **2** (100 MHz, DMSO-*d*<sub>6</sub>, 25 °C).

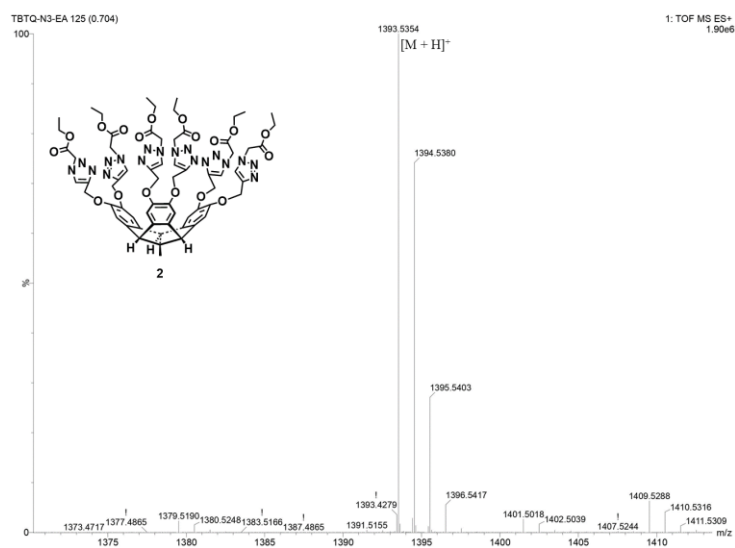

**Figure S3:** (+)-ESI mass spectrum of compound **2**.

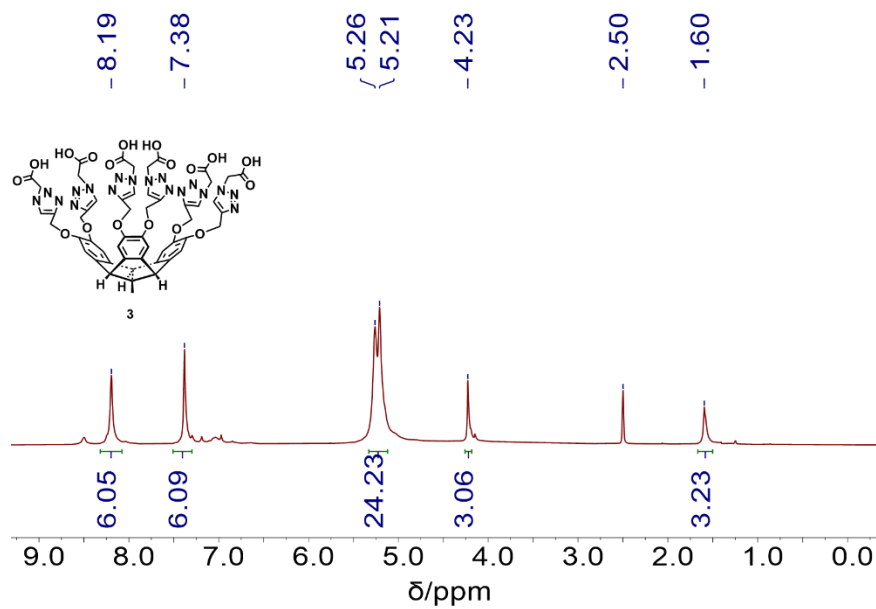

**Figure S4:** <sup>1</sup>H NMR spectrum of compound **3** (400 MHz, DMSO-*d*<sub>6</sub>, 25 °C).

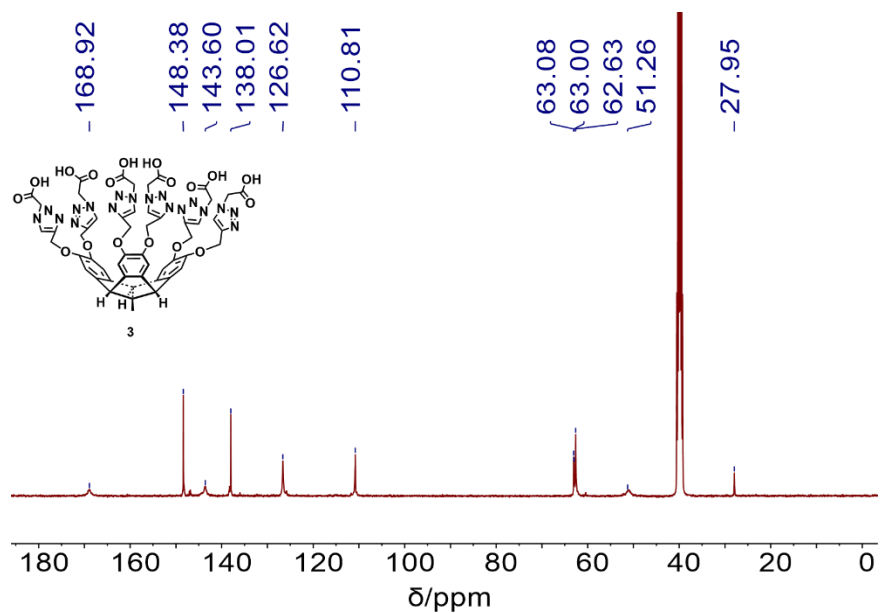

**Figure S5:**  $^{13}\text{C}$  NMR spectrum of compound **3** (100 MHz,  $\text{DMSO-}d_6$ , 25 °C).

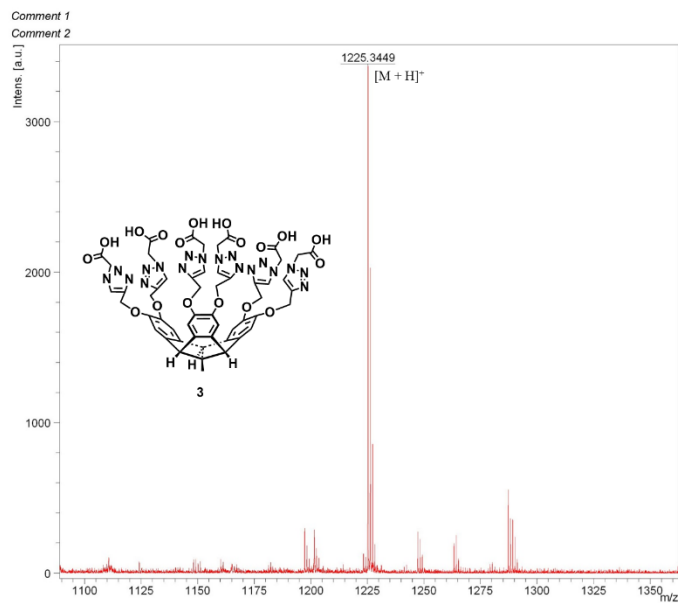

**Figure S6:** MALDI-TOF mass spectrum of compound **3**.

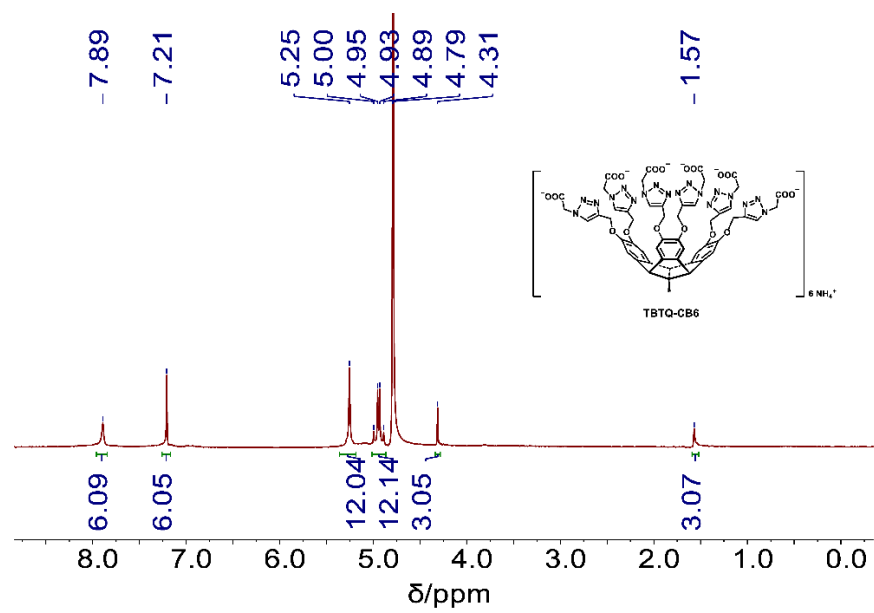

**Figure S7:**  $^1\text{H}$  NMR spectrum of compound **TBTQ-CB6** (400 MHz,  $\text{D}_2\text{O}$ , 25 °C).

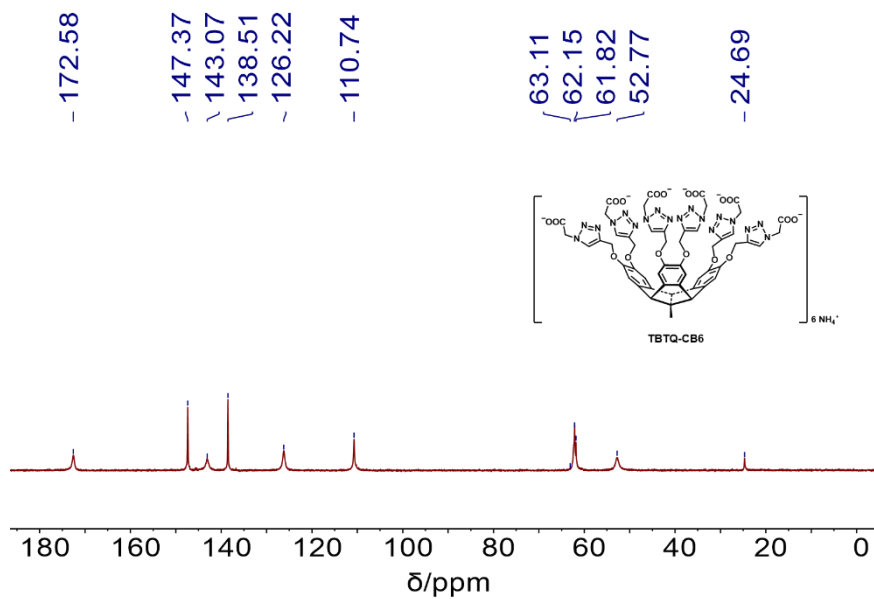

**Figure S8:**  $^{13}\text{C}$  NMR spectrum of compound **TBTQ-CB6** (100 MHz,  $\text{D}_2\text{O}$ , 25 °C).

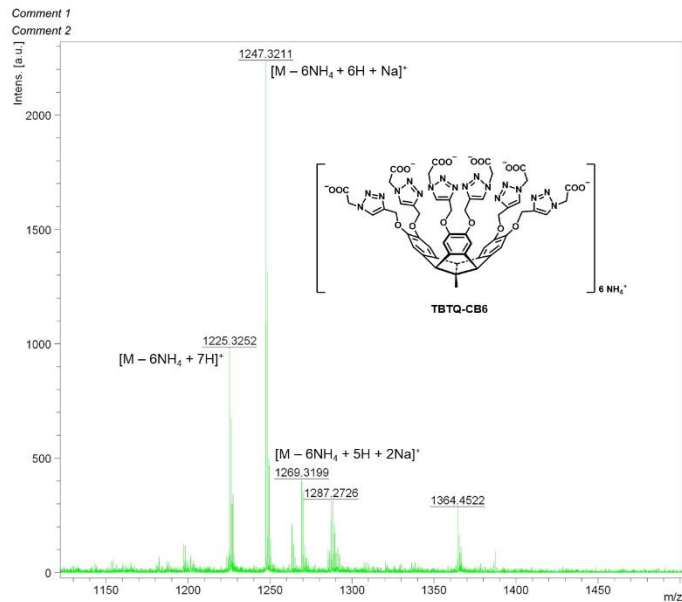

**Figure S9:** MALDI-TOF mass spectrum of compound TBTQ-CB6.

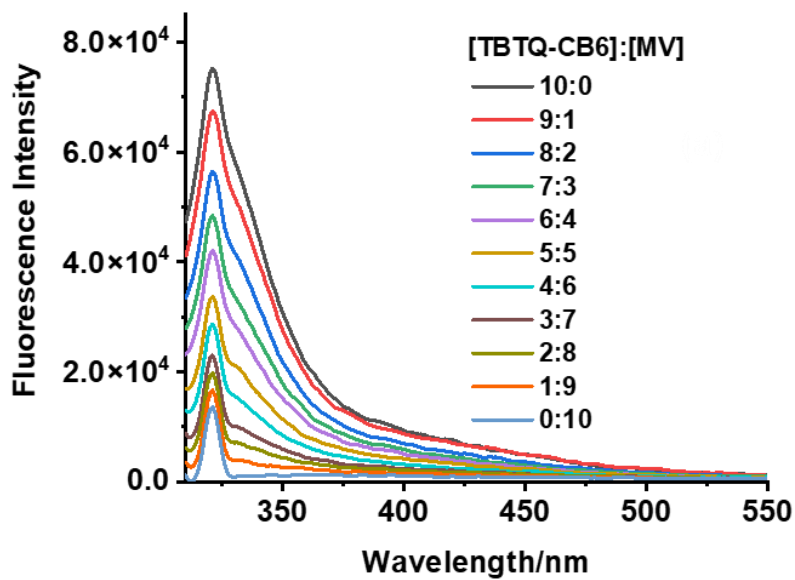

**Figure S10:** Fluorescence spectra of the mixture of TBTQ-CB6 and MV in different molar ratios at a constant total concentration of 10 μM.

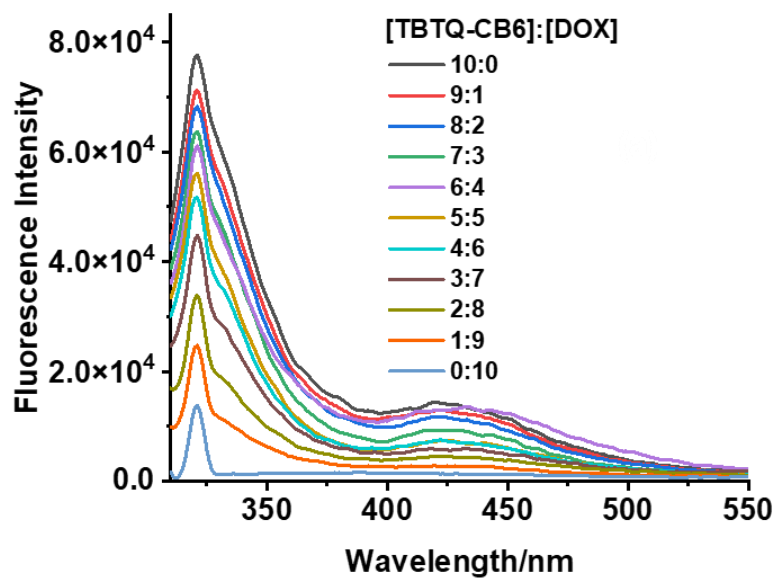

**Figure S11:** Fluorescence spectra of the mixture of TBTQ-CB6 and DOX in different molar ratios at a constant total concentration of 10  $\mu\text{M}$ .
